# Supplementary material for: Mapping mechanisms and growth regimes of magnesium electrodeposition at high current densities
Source: Royal Society of Chemistry journal article supplement (doi:10.1039/c9mh01367a), 2019-11-25
Supplement: c9mh01367a1.pdf [file c9mh01367a1.pdf]

## Mapping Mechanisms and Growth Regimes of Magnesium Electrodeposition at High Current Densities

Rachel Davidson,<sup>a,b</sup> Ankit Verma,<sup>c</sup> David Santos,<sup>a,b</sup> Feng Hao,<sup>c</sup> Cole Fincher,<sup>d</sup> Dexin Zhao,<sup>b</sup> Vahid Attari,<sup>b,d</sup> Parker Schofield,<sup>a,b</sup> Jonathan Van Buskirk,<sup>a,b</sup> Antonio Fraticelli-Cartagena,<sup>a</sup> Theodore E. G. Alivio,<sup>a,b</sup> Raymundo Arroyave,<sup>b,d</sup> Kelvin Xie,<sup>b</sup> Matt Pharr,<sup>d</sup> Partha P. Mukherjee,<sup>c\*</sup> Sarbajit Banerjee<sup>a,b\*</sup>

*a)* Department of Chemistry, Texas A&M University, College Station, TX 77843, USA.

*b)* Department of Materials Science & Engineering, Texas A&M University, College Station, TX 77843, USA.

*c)* School of Mechanical Engineering, Purdue University, West Lafayette, IN 47907, USA.

*d)* Department of Mechanical Engineering, Texas A&M University, College Station, TX 77843, USA

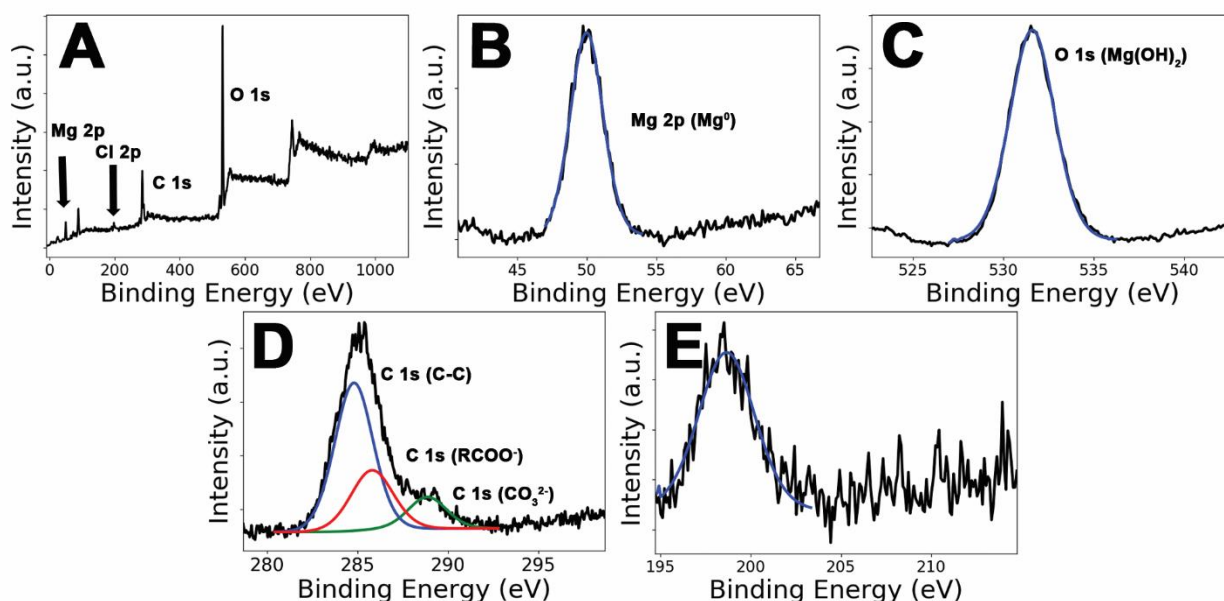

**Figure S1.** A) XPS survey scan measured for detached Mg fractal deposits formed at a current density of 0.921 mA/cm<sup>2</sup> from a 0.5M solution of MeMgCl in THF; High-resolution XPS spectra measured at B) Mg 2p; C) O 1s; D) C 1s regions; and E) high-resolution Cl 2p XPS spectrum. Spectral assignments are indicated for each of the deconvoluted lines.

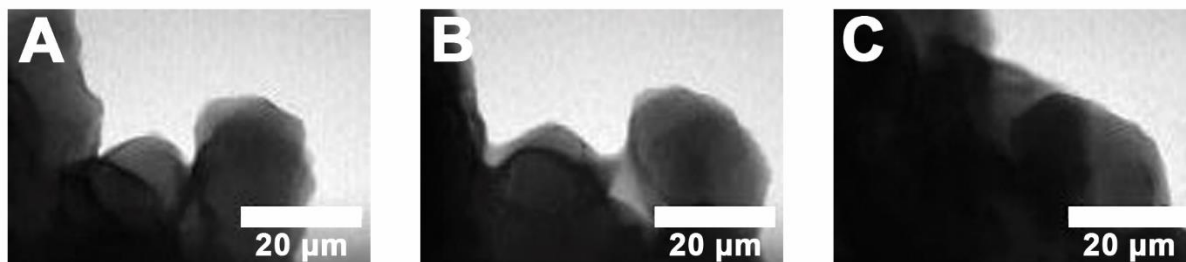

**Figure S2.** Projections of 3D tomographic maps from soft-X-ray microscopy at the Mg K-edge acquired at tilt angles of A) 40°, B) 80°, and C) 120°.

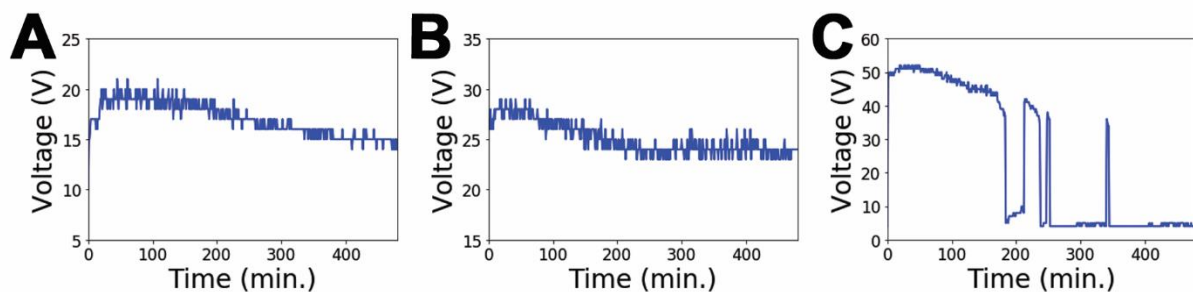

**Figure S3.** Plots of voltage *versus* time for the electrodeposition of Mg from MeMgCl as a function of applied current density for electrodeposition reactions at A) 0.307, B) 0.921, and C) 1.54 mA/cm<sup>2</sup> constant current applied for 8 h in 0.5 M MeMgCl solutions in THF.

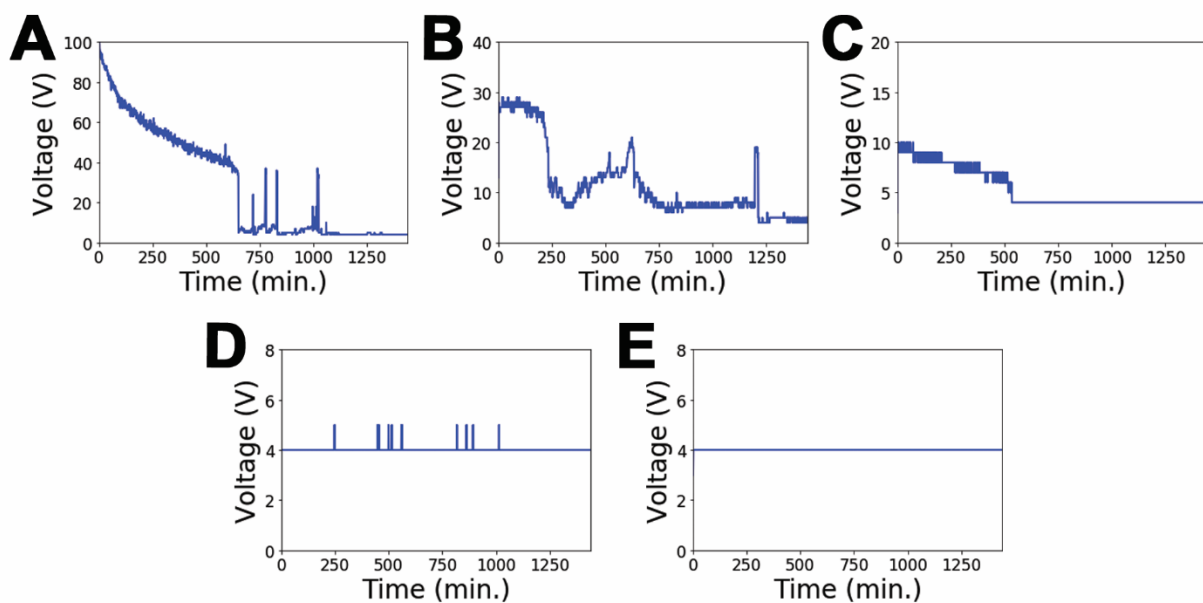

**Figure S4.** Plots of voltage *versus* time for the electrodeposition of Mg from MeMgCl as a function of concentration of electrolyte showing plots for reactions run with A) 0.25, B) 0.5, C) 1.0, D) 1.5, E) 2.0 M MeMgCl electrolyte solutions under a constant current of 0.921 mA/cm<sup>2</sup> applied for 24

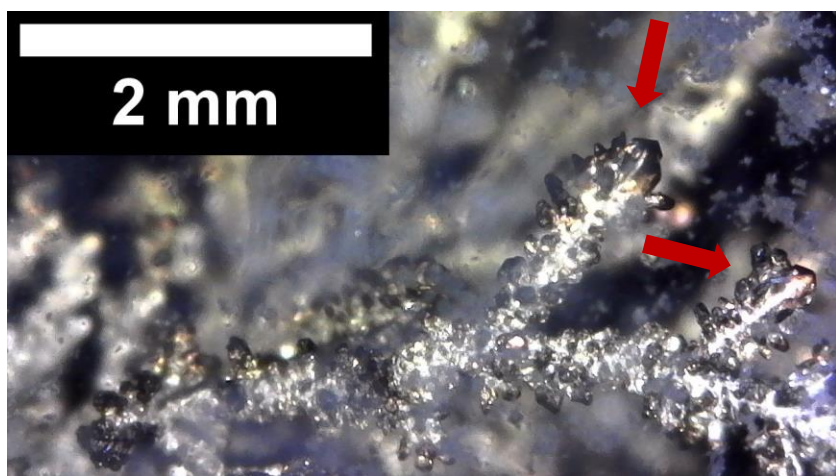

**Figure S5.** Digital image of a dendrite deposited under 0.921 mA/cm<sup>2</sup> applied current density in a 1.5 M MeMgCl solution for 24 h.

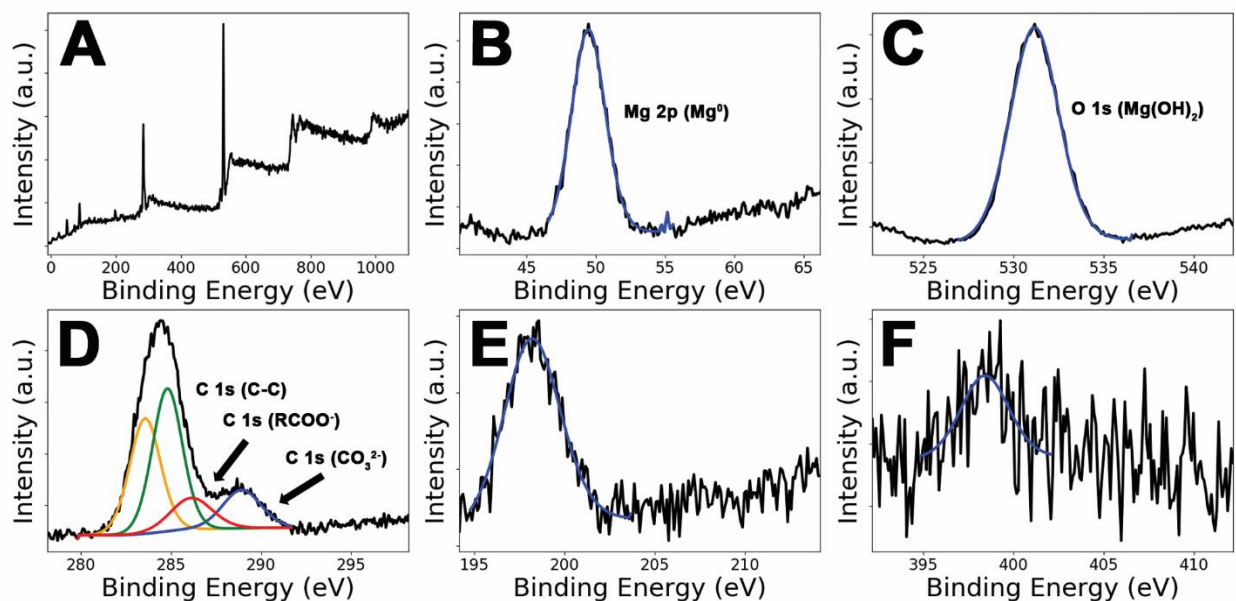

**Figure S6.** A) XPS survey scan measured for detached Mg fractal deposits formed at a current density of 0.921 mA/cm<sup>2</sup> from a 0.5M solution of MeMgCl in THF with the addition of oleylamine; High-resolution XPS spectra measured at B) Mg 2p; C) O 1s; D) C 1s regions; E) high-resolution Cl 2p XPS spectrum; and F) N 1s. Spectral assignments are indicated for each of the deconvoluted lines.

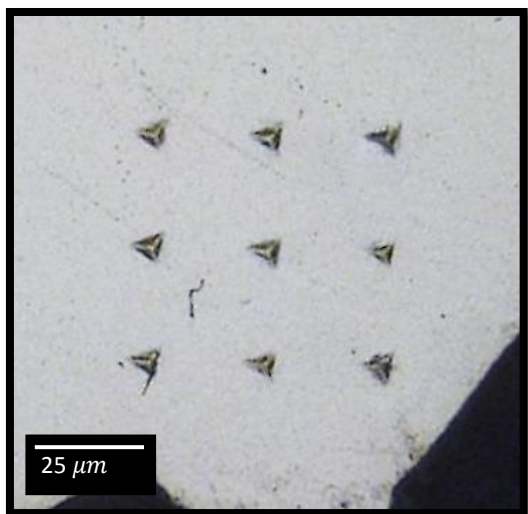

**Figure S7.** Optical image acquired for a set of indents in the cross-section of a polished Mg dendrite grown in 0.5 M MeMgCl solutions under 0.921 mA/cm<sup>2</sup> applied constant current for 24 h, displaying insignificant indentation pile-up.

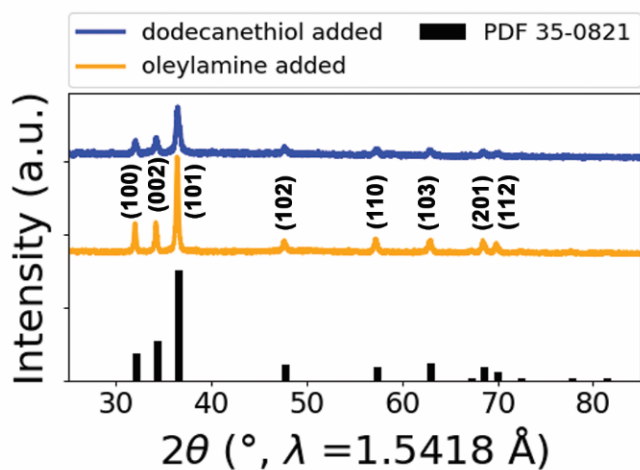

**Figure S8.** Powder XRD patterns for Mg deposits electrodeposited at a current density of 0.921 mA/cm<sup>2</sup> from 0.5M MeMgCl electrolyte solutions with the addition of dodecanethiol and oleylamine. The reflections can be indexed to metallic Mg with hexagonal close packing of atoms (PDF 35-0821).

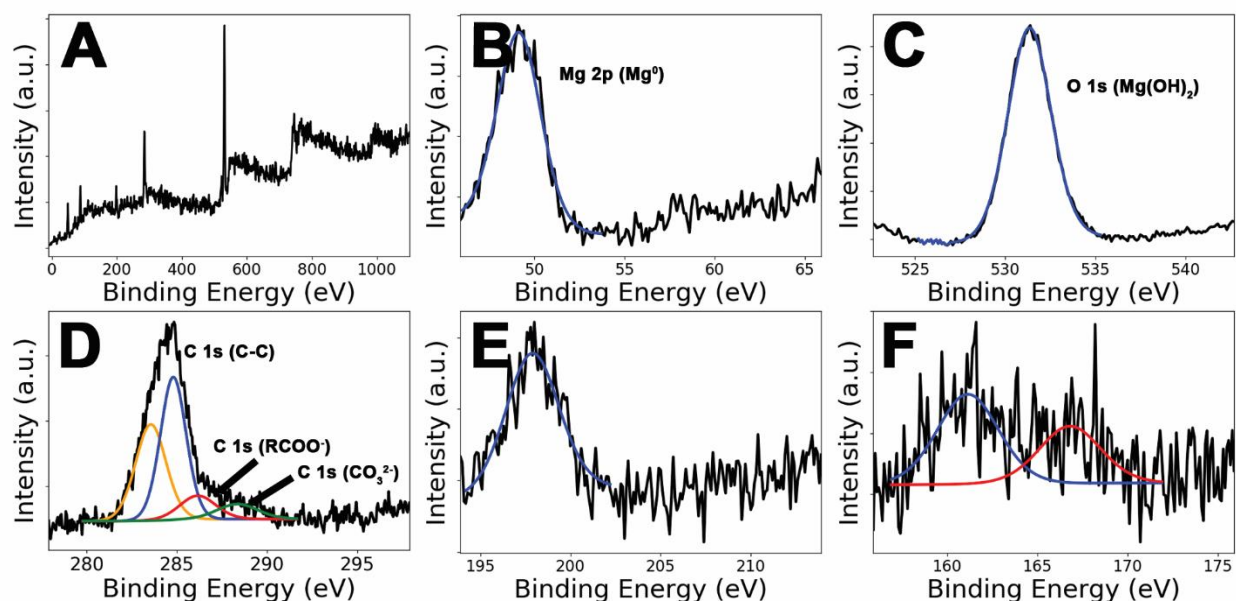

**Figure S9.** A) XPS survey scan measured for detached Mg fractal deposits formed at a current density of  $0.921 \text{ mA/cm}^2$  from a  $0.5\text{M}$  solution of  $\text{MeMgCl}$  in THF with the addition of dodecanethiol; High-resolution XPS spectra measured at B) Mg 2p; C) O 1s; D) C 1s regions; E) high-resolution Cl 2p XPS spectrum; and F) S 2p. Spectral assignments are indicated for each of the deconvoluted lines.

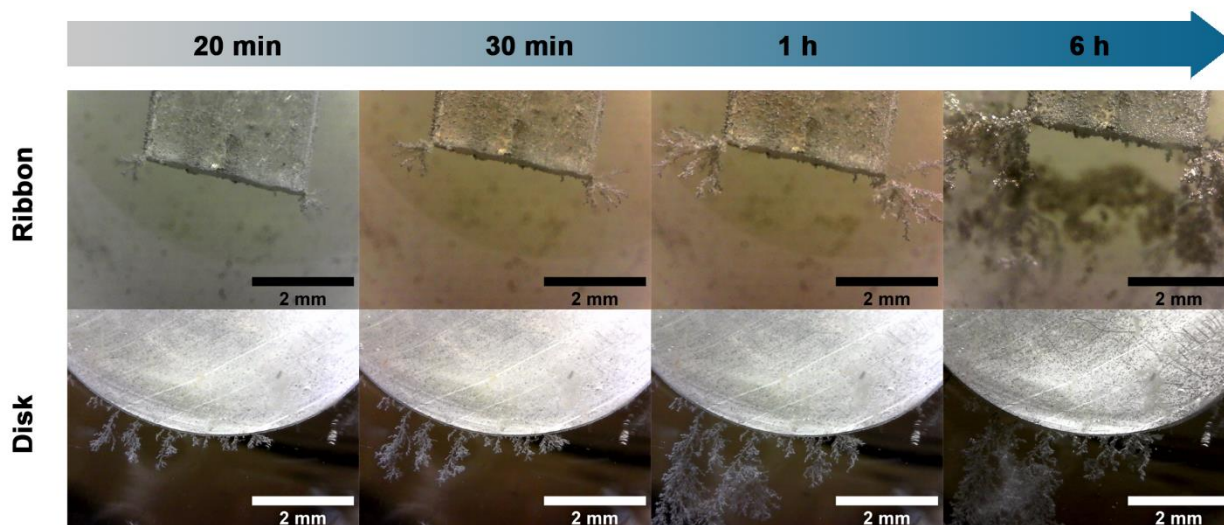

**Figure S10.** Digital images of an Mg ribbon and disk electrode as a function of time upon electrodeposition from a  $0.5 \text{ M}$   $\text{MeMgCl}$  solution in THF under a  $0.921 \text{ mA/cm}^2$  applied current density held constant for 24 h.



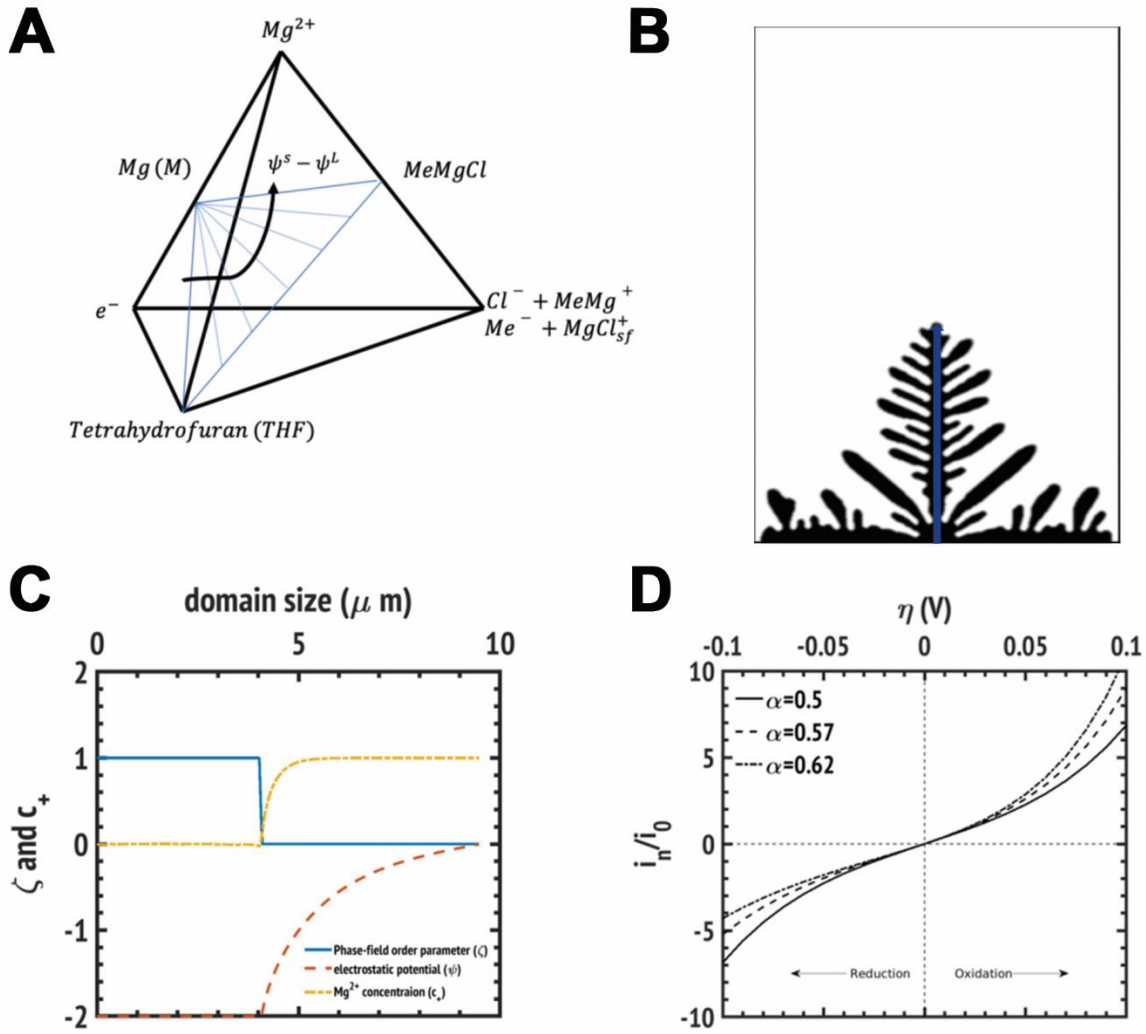

**Figure S11.** A) Hypothetical phase diagram and charge-neutral plane for Mg(M)-MeMgCl-THF. B) Dendrite formed following initial seeding at the bottom center of the domain. C) Phase-field order parameters extracted along the blue line in (B). D) Comparison of the nonlinear phase-field model with a Butler-Volmer symmetric coefficient of  $\alpha=0.5$  used in this study and Butler-Volmer coefficients reported by Viestfrid and co. workers<sup>1</sup> for (0.25 M complex in THF) and for (0.25 M complex in (0.25 M Bu<sub>2</sub>Mg + THF) solutions).

**Phase-field modeling of dendritic growth.** The model described here was developed based on the earlier work of Guyer et. al<sup>2</sup>, Bazant<sup>3</sup>, Chen et al<sup>4</sup>, and Yurkiv et al<sup>5</sup>. Primary deposition occurs through the reaction of  $M^{n+}$  cations in the electrolyte solution ( $M^{n+} + A^{n-}$ ) with electrons  $e^-$  at the surface of the electrode. In an isothermal and isobaric state, the total free energy of a heterogeneous system with constant volume  $V$  is given by:

$$F^{tot}(\zeta, c_i, \nabla c_i, \psi) = \int_V [f^{chem} + f^{int} + f^{elec} + f^{noise}] dV \quad (S1)$$

where  $f^{chem}$ ,  $f^{int}$ ,  $f^{elec}$  and  $f^{noise}$  are the chemical, interfacial, electrical, and Langevin noise contributions respectively, given as:

$$f^{chem} = g(\bar{c}) + RT[\bar{c}_+ \ln(\bar{c}_+) + \bar{c}_- \ln(\bar{c}_-)] \quad (S2)$$

$$f^{int} = \frac{1}{2} \nabla c \kappa \cdot \nabla c \quad (S3)$$

$$f^{elec} = \mathcal{F} \sum_i z_i c_i \psi \quad (S4)$$

$$f^{noise} = A h'(\zeta) \chi \quad (S5)$$

where  $g(\bar{c}) = W\bar{c}^2(1 - \bar{c}^2) = W\zeta^2(1 - \zeta^2)$  is a double well potential function with  $W$  being the barrier height of transformation in between the equilibrium states of the electrode and electrolyte. The second term in Eq. (S2) is the entropic contribution of mixing ions where  $R$  is the ideal gas constant, and  $T$  is the operating temperature.  $f^{int}$  describes the interfacial contributions due to heterogeneous nature of the electrode-electrolyte interface where the anisotropic characteristics of this interface was taken into account by:

$$\kappa(\theta) = \kappa_0(1 + \delta \cos[j\theta - \theta_0]) \quad (S6)$$

where  $\delta$  and  $j$  are the strength and mode of anisotropy, respectively;  $\kappa_0$  is the interface energy gradient,  $\theta$  and  $\theta_0$  are related to the angle between the normal vector of the surface and the reference axis.  $f^{elec}$  is the electrostatic energy density, where  $\mathcal{F}$  and  $z_i$  are the Faraday's constant and valence of species  $i$ , respectively. An additional phase-field variable was used to distinguish the states of the electrolyte ( $\zeta = 0$ ) and electrode ( $\zeta = 1$ ), which continuously changes in the interface region.  $f^{noise}$  denotes the Langevin noise, which was applied to the interface region by using  $\chi$ , which is a quasi-random number between  $[-1,1]$ , and  $A$  is the amplitude of the fluctuation. The evolution of the non-conserved, conserved, and electrostatic fields were prescribed by the following equations, respectively:

$$\frac{\partial \zeta}{\partial t} = -L_\sigma(g'(\zeta) - \kappa(\theta)\nabla^2 \zeta) - \Gamma \quad (S7)$$

$$\frac{\partial c_\pm}{\partial t} = \nabla \left[ D^{eff} \nabla c_\pm + \frac{D^{eff} c_\pm}{RT} n \mathcal{F} \nabla \psi \right] - \frac{c_\pm}{c_0} \frac{\partial \zeta}{\partial t} \quad (S8)$$

$$\nabla[\sigma^{eff} \nabla \psi] = n \mathcal{F} c_s \frac{\partial \zeta}{\partial t} \quad (S9)$$

where  $L_\sigma$  is the interface mobility, and  $\Gamma$  is the electrodeposition rate defined by:

$$\Gamma = L_\eta i_0 h'(\zeta) \left\{ e^{\frac{(1-\alpha)nF\eta_a}{RT}} - c_+ e^{\frac{(\alpha)nF\eta_a}{RT}} \right\} \quad (\text{S10})$$

where  $L_\eta$  is the reaction related kinetic coefficient,  $i_0$  is the exchange current density,  $h'$  is the derivative of the interpolation function  $h(\zeta) = \zeta^3(10 - 15\zeta + 6\zeta^2)$ ,  $\alpha$  is the anodic/cathodic symmetric charge-transfer coefficient (assumed to be 0.5 in this study ( $0 < \alpha < 1$ )), and  $\eta_a$  is the overpotential.  $D^{eff}$  and  $\sigma^{eff}$  are the interdiffusion and conductivity, respectively defined over the domain by means of the interpolation function  $h(\zeta)$ . The source term in Eq. (S9) is related to reaction rate.

**Table S1.** List of boundary conditions used for equations 7-9

|            | Eq. (7)           | Eq. (8)               | Eq. (9)                               |
|------------|-------------------|-----------------------|---------------------------------------|
| Top        |                   | $c = c^{electrolyte}$ | $\nabla\psi = \Delta\psi_{half-cell}$ |
| Bottom     | $\nabla\zeta = 0$ | $c = c^{Mg^{2+}}$     | $\nabla\psi = \Delta\psi_{anode}$     |
| Left/Right |                   | $\nabla c = 0$        | $\nabla\psi = 0$                      |

#### References:

- (1) Viestfrid, Y.; Levi, M. D.; Gofer, Y.; Aurbach, D. Microelectrode Studies of Reversible Mg Deposition in THF Solutions Containing Complexes of Alkylaluminum Chlorides and Dialkylmagnesium. *J. Electroanal. Chem.* **2005**, 576 (2), 183–195.
- (2) Guyer, J. E.; Boettinger, W. J.; Warren, J. A.; Mcfadden, G. B. *Phase Field Modeling of Electrochemistry II: Kinetics*; 2003.
- (3) Bazant, M. Z. Theory of Chemical Kinetics and Charge Transfer Based on Nonequilibrium Thermodynamics. **2019**, 6, 23.
- (4) Chen, L.; Zhang, H. W.; Liang, L. Y.; Liu, Z.; Qi, Y.; Lu, P.; Chen, J.; Chen, L.-Q. Modulation of Dendritic Patterns during Electrodeposition: A Nonlinear Phase-Field Model. *J. Power Sources* **2015**, 300, 376–385.
- (5) Yurkiv, V.; Foroozan, T.; Ramasubramanian, A.; Shahbazian-Yassar, R.; Mashayek, F. Phase-Field Modeling of Solid Electrolyte Interface (SEI) Influence on Li Dendritic Behavior. *Electrochim. Acta* **2018**, 265, 609–619.
